# Supplementary material
Source: PubMed Central journal article supplement (PMC3908667)

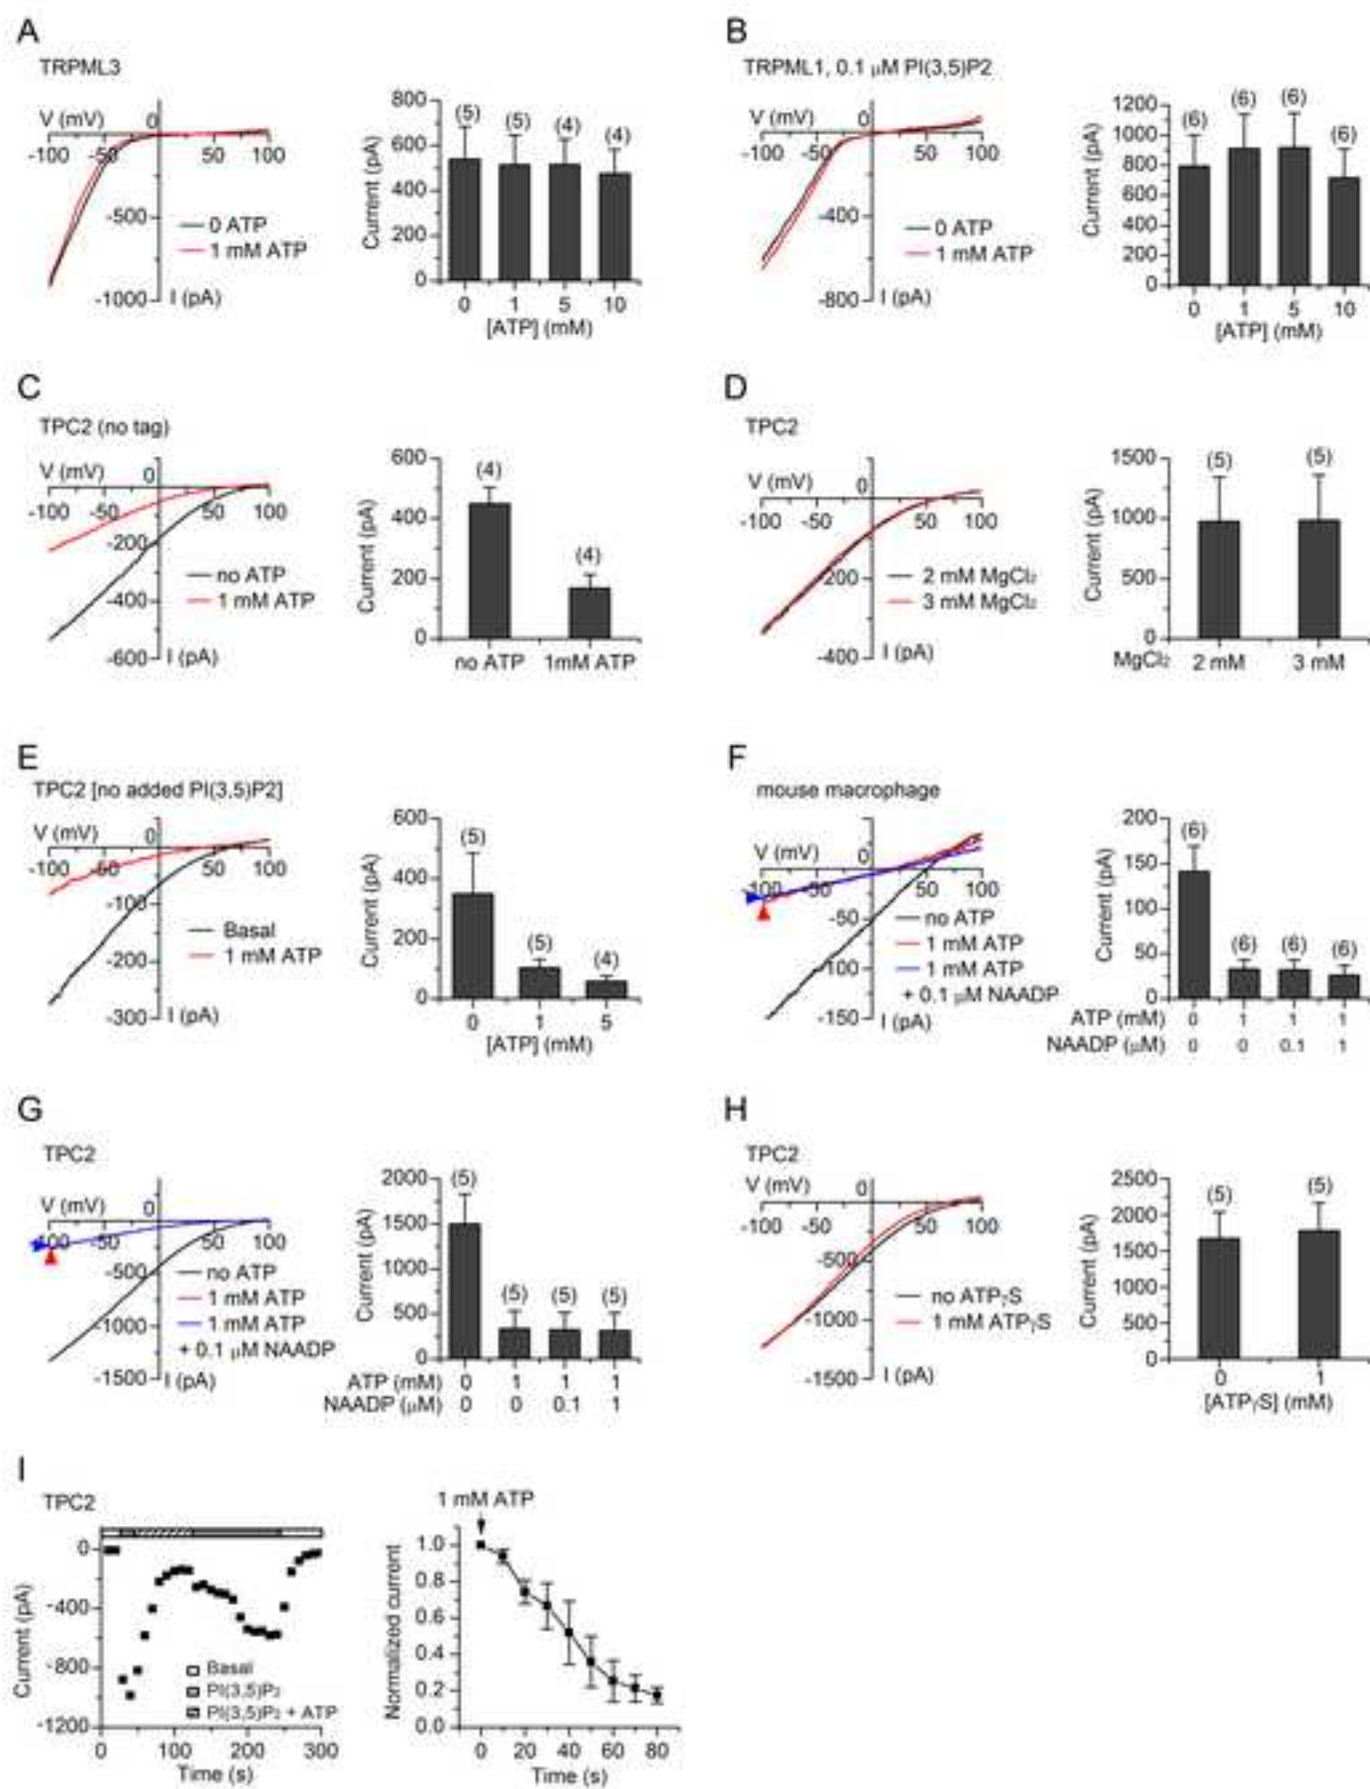

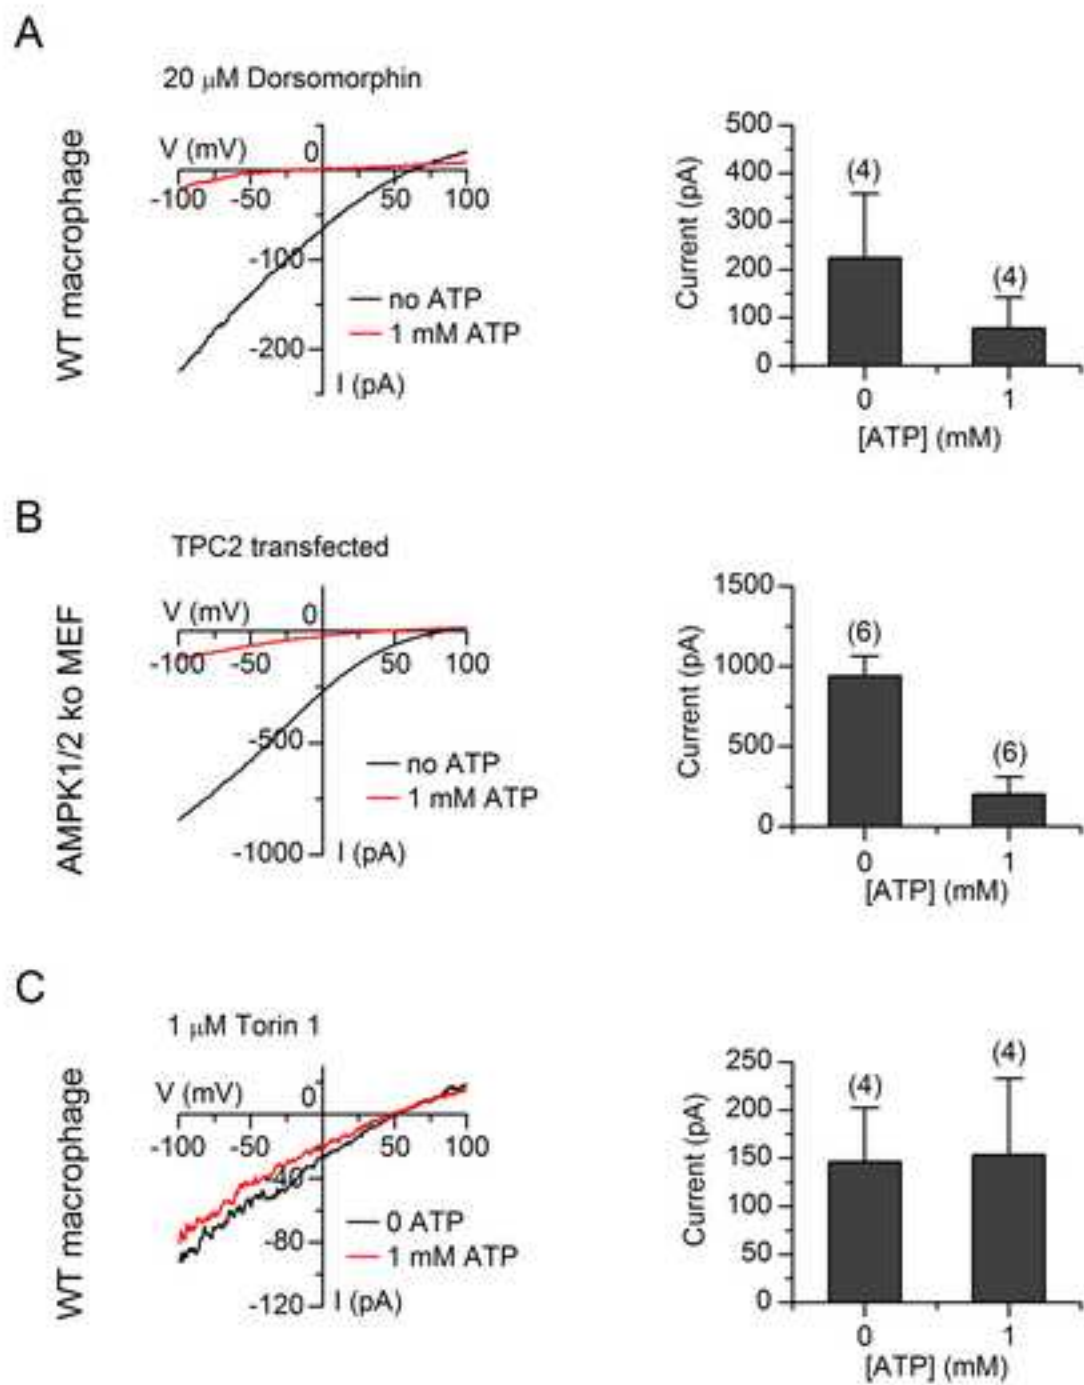

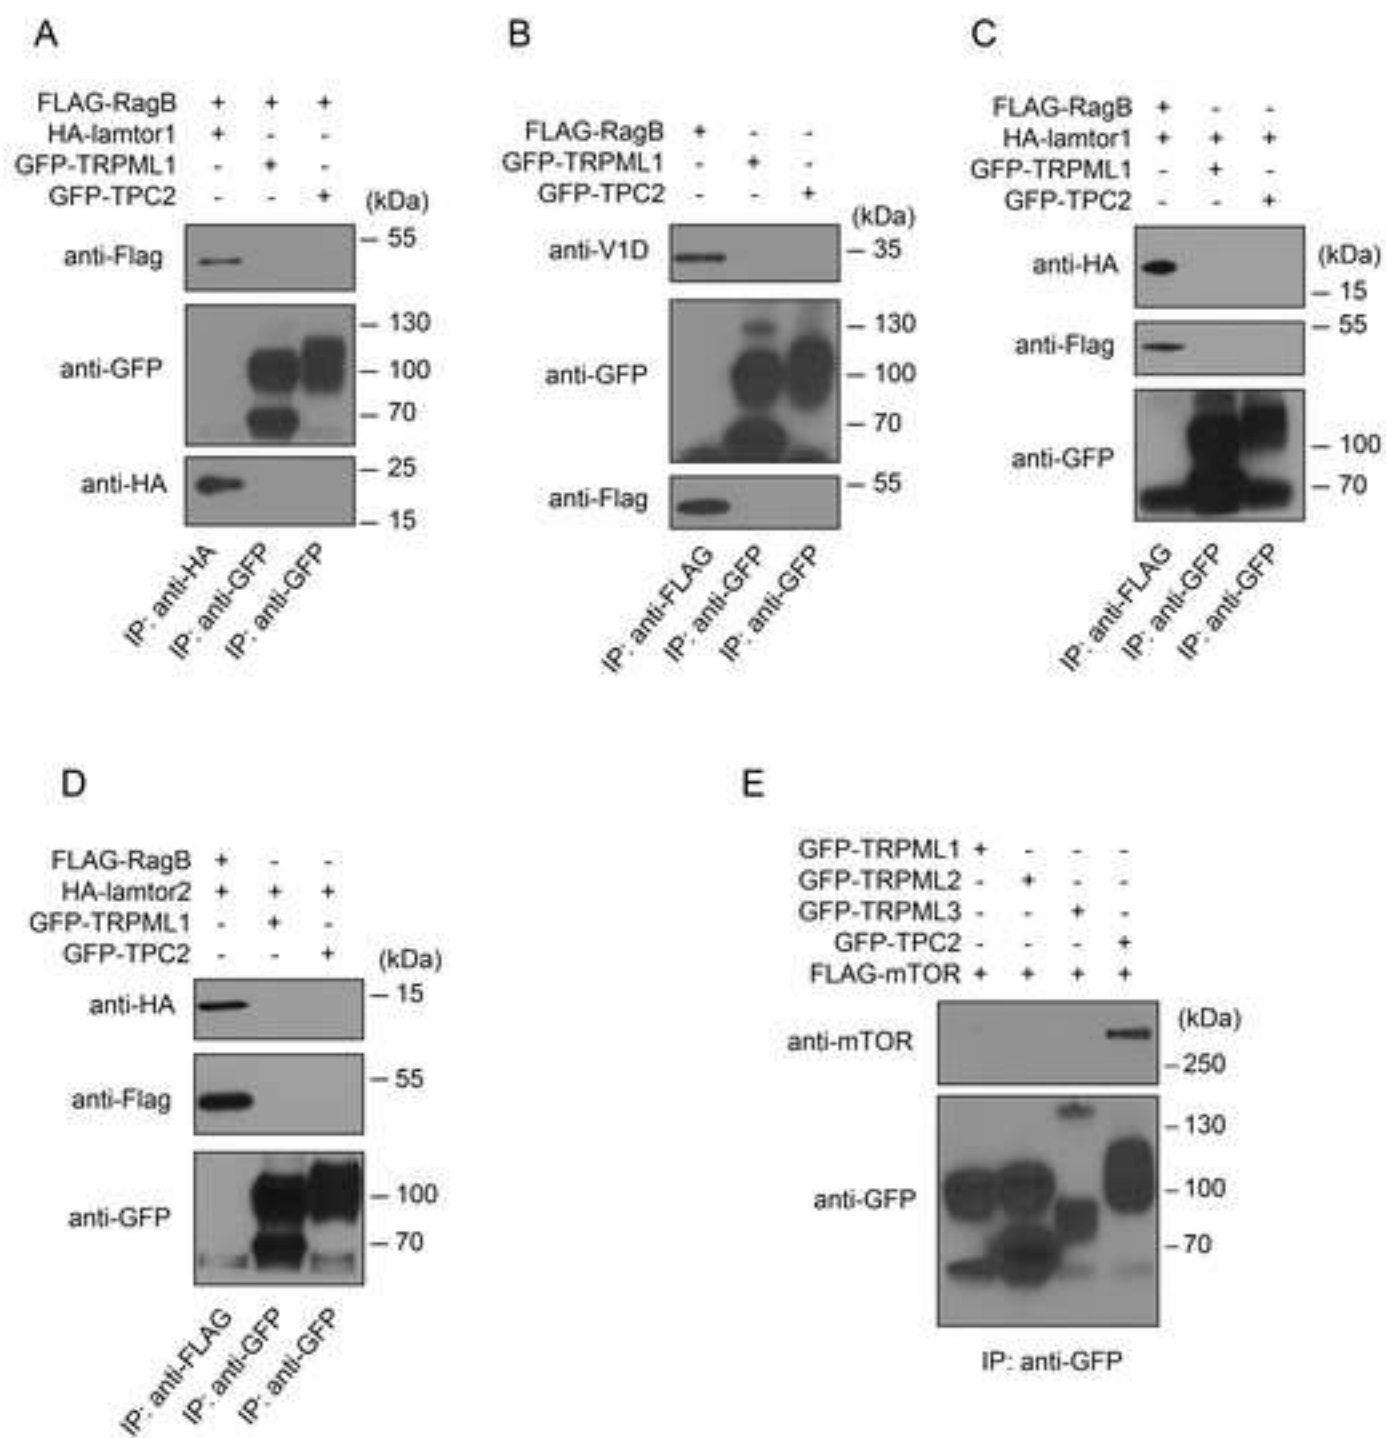

A

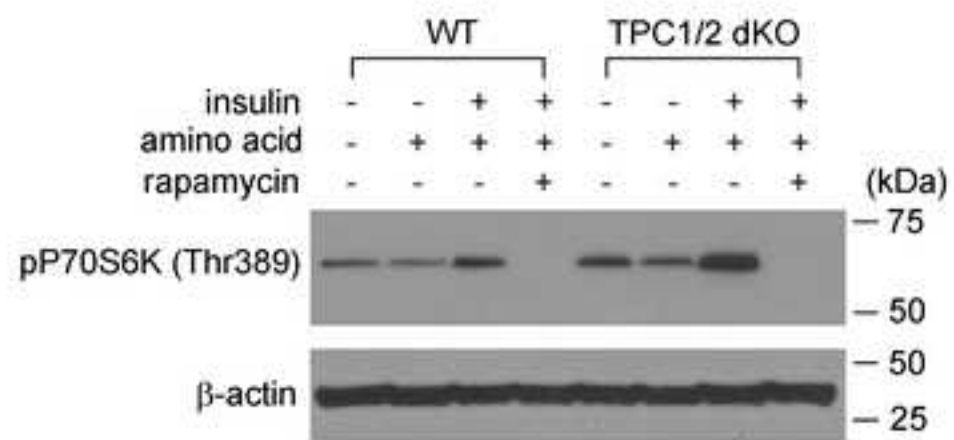

B

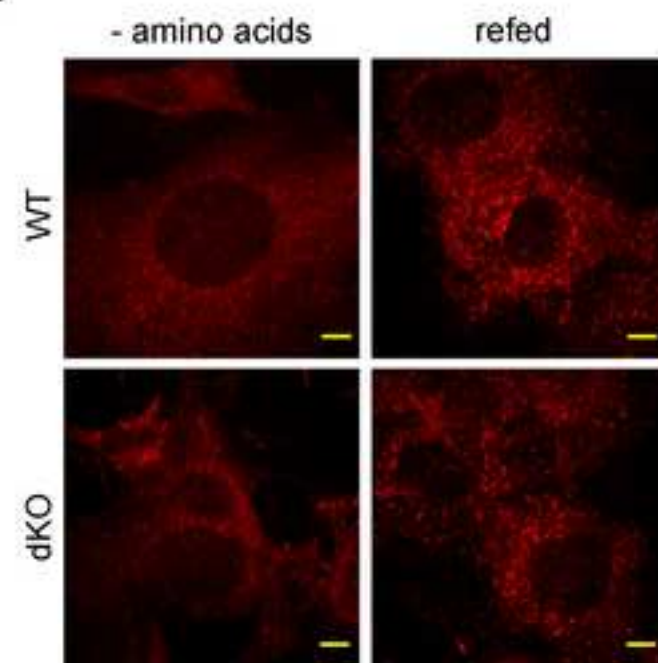

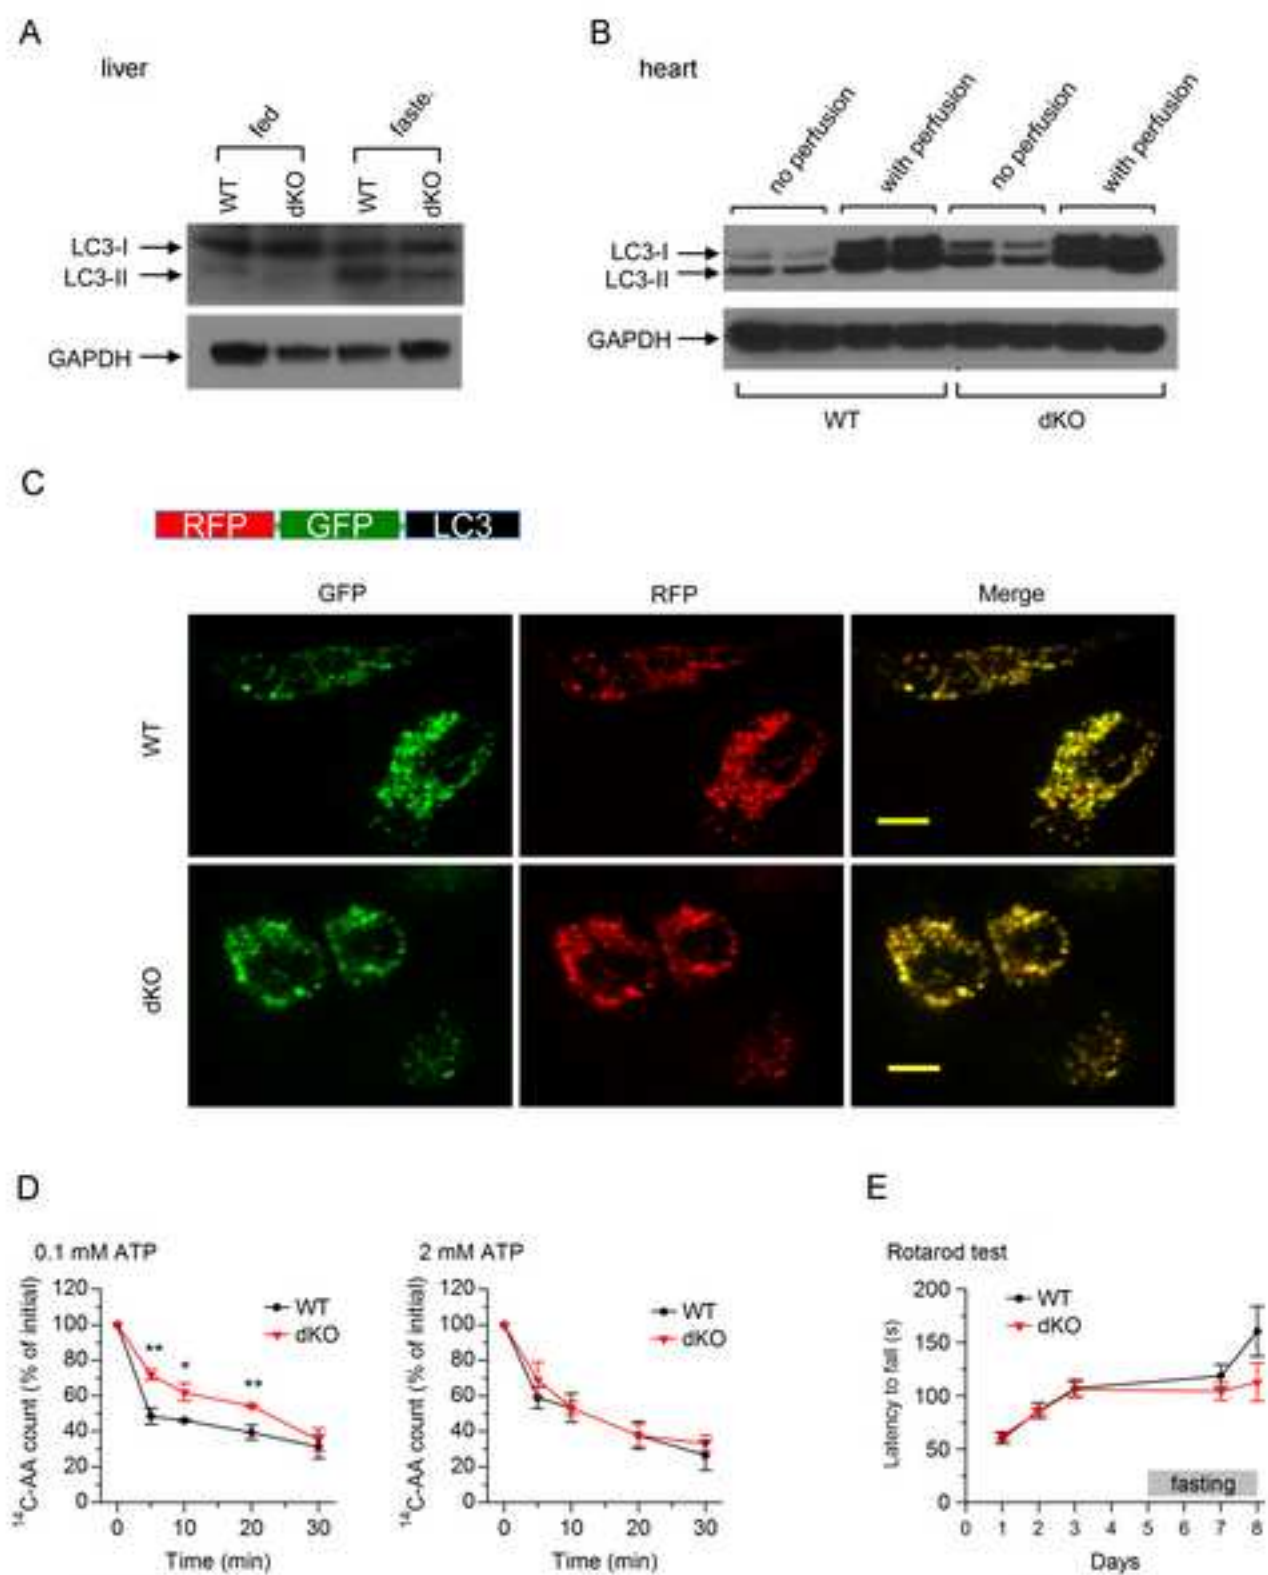

Supplement: NIHMS437621-supplement-02.pdf [file NIHMS437621-supplement-02.pdf]
